# Supplementary material
Source: PubMed Central journal article supplement (PMC6625826)
Supplement: NIHMS968966-supplement-Supplemental.pdf [file NIHMS968966-supplement-Supplemental.pdf]

Supplemental tables

Supplemental Table 1. Diagnostic Testing Performed Prior to Florbetapir Amyloid PET Scan

|                                           | <i>AUC</i>                |                           |                        | <i>Non-AUC</i>            |                           |                        |
|-------------------------------------------|---------------------------|---------------------------|------------------------|---------------------------|---------------------------|------------------------|
|                                           | <i>Group A<br/>(n=65)</i> | <i>Group B<br/>(n=60)</i> | <i>All<br/>(n=125)</i> | <i>Group A<br/>(n=45)</i> | <i>Group B<br/>(n=59)</i> | <i>All<br/>(n=104)</i> |
| Neuropsy Testing                          | 49 (75.4%)                | 25 (41.7%)                | 74 (59.2%)             | 37 (82.2%)                | 27 (45.8%)                | 64 (61.5%)             |
| Brain Structural Imaging (CT/MRI)         | 63 (96.9%)                | 30 (50.0%)                | 93 (74.4%)             | 42 (93.3%)                | 19 (32.2%)                | 61 (58.7%)             |
| Lumbar Puncture                           | 5 (7.7%)                  | 5 (8.3%)                  | 10 (8.0%)              | 3 (6.7%)                  | 1 (1.7%)                  | 4 (3.8%)               |
| FDG PET                                   | 10 (15.4%)                | 6 (10.0%)                 | 16 (12.8%)             | 4 (8.9%)                  |                           | 4 (3.8%)               |
| ApoE                                      | 19 (29.2%)                | 10 (16.7%)                | 29 (23.2%)             | 9 (20.0%)                 | 4 (6.8%)                  | 13 (12.5%)             |
| Lab Tests(CBC/Serum Chemistry/Urinalysis) | 38 (58.5%)                | 22 (36.7%)                | 60 (48.0%)             | 21 (46.7%)                | 21 (35.6%)                | 42 (40.4%)             |

Supplemental Table 2. Detailed change in diagnosis after receipt of florbetapir scan results

| <u>AUC like</u>                         | <u>Prescan diagnosis</u>                                                                 | <u>Postscan Diagnosis</u> |                        |                        | <u>Change in Diagnosis</u> |
|-----------------------------------------|------------------------------------------------------------------------------------------|---------------------------|------------------------|------------------------|----------------------------|
|                                         |                                                                                          | <u>Due to AD</u>          | <u>Indeterminate</u>   | <u>Not due to AD</u>   |                            |
| <u>All subjects (n=125)</u>             | <u>Due to AD: Atypical AD (n=10)</u>                                                     | <u>7 (70.0%)</u>          | <u>0 (0.0%)</u>        | <u>3 (30.0%)</u>       | <u>3/10 (30.0%)</u>        |
|                                         | <u>Due to AD: Lewy Body Disease with AD (amyloid) pathology (n=3)</u>                    | <u>1 (33.3%)</u>          | <u>0 (0.0%)</u>        | <u>2 (66.7%)</u>       | <u>2/3 (66.7%)</u>         |
|                                         | <u>Due to AD: Mixed Dementia with AD (n=8)</u>                                           | <u>6 (75.0%)</u>          | <u>0 (0.0%)</u>        | <u>2 (25.0%)</u>       | <u>2/8 (25.0%)</u>         |
|                                         | <u>Indeterminate: Dementia, MCI or cognitive decline with uncertain etiology (n=98)</u>  | <u>40 (40.8%)</u>         | <u>31 (31.6%)</u>      | <u>27 (27.6%)</u>      | <u>67/98 (68.4%)</u>       |
|                                         | <u>Not due to AD: Dementia or impairment with non AD working diagnosis (n=6)</u>         | <u>4 (66.7%)</u>          | <u>0 (0.0%)</u>        | <u>2 (33.3%)</u>       | <u>4/6 (66.7%)</u>         |
|                                         | <b><u>Total</u></b>                                                                      | <b><u>58 (46%)</u></b>    | <b><u>31 (25%)</u></b> | <b><u>36 (29%)</u></b> | <b><u>78 (62%)</u></b>     |
| <u>Amyloid-negative subjects (N=66)</u> | <u>Due to AD: Atypical AD (n=3)</u>                                                      | <u>0 (0.0%)</u>           | <u>0 (0.0%)</u>        | <u>3 (100.0%)</u>      | <u>3/3 (100.0%)</u>        |
|                                         | <u>Due to AD: Lewy Body Disease with AD (amyloid) pathology (n=2)</u>                    | <u>0 (0.0%)</u>           | <u>0 (0.0%)</u>        | <u>2 (100.0%)</u>      | <u>2/2 (100.0%)</u>        |
|                                         | <u>Due to AD: Mixed Dementia with AD (n=2)</u>                                           | <u>0 (0.0%)</u>           | <u>0 (0.0%)</u>        | <u>2 (100.0%)</u>      | <u>2/2 (100.0%)</u>        |
|                                         | <u>Indeterminate: Dementia, MCI or cognitive decline with uncertain etiology, (n=57)</u> | <u>0 (0.0%)</u>           | <u>30 (52.6%)</u>      | <u>27 (47.4%)</u>      | <u>27/57 (47.4%)</u>       |
|                                         | <u>Not due to AD: Dementia or impairment with non AD working diagnosis (n=2)</u>         | <u>0 (0.0%)</u>           | <u>0 (0.0%)</u>        | <u>2 (100.0%)</u>      | <u>0/2 (0.0%)</u>          |
| <u>Amyloid-positive subjects (N=59)</u> | <u>Due to AD: Atypical AD (n=7)</u>                                                      | <u>7 (100.0%)</u>         | <u>0 (0.0%)</u>        | <u>0 (0.0%)</u>        | <u>0/7 (0.0%)</u>          |
|                                         | <u>Due to AD: Lewy Body Disease with AD (amyloid) pathology (n=1)</u>                    | <u>1 (100.0%)</u>         | <u>0 (0.0%)</u>        | <u>0 (0.0%)</u>        | <u>0/1 (0.0%)</u>          |
|                                         | <u>Due to AD: Mixed Dementia with AD (n=6)</u>                                           | <u>6 (100.0%)</u>         | <u>0 (0.0%)</u>        | <u>0 (0.0%)</u>        | <u>0/6 (0.0%)</u>          |
|                                         | <u>Indeterminate: Dementia, MCI or cognitive decline with uncertain etiology, (n=41)</u> | <u>40 (97.6%)</u>         | <u>1 (2.4%)</u>        | <u>0 (0.0%)</u>        | <u>40/41 (97.6%)</u>       |
|                                         | <u>Not due to AD: Dementia or impairment with non AD working diagnosis (n=4)</u>         | <u>4 (100.0%)</u>         | <u>0 (0.0%)</u>        | <u>0 (0.0%)</u>        | <u>4/4 (100.0%)</u>        |

Supplemental Table 3. Overall Change in Management Plan

|        | % Management Plan Changed |         |         | p Group A vs Group B |
|--------|---------------------------|---------|---------|----------------------|
|        | Total                     | Group A | Group B |                      |
| AUC    | 88.00                     | 78.46   | 98.33   | <u>0.0006</u>        |
| NonAUC | 85.58                     | 77.78   | 91.53   | <u>0.0884</u>        |
| Total  | 86.90                     | 78.18   | 94.96   | <u>0.0002</u>        |

Formatted: Centered  
Formatted: Centered  
Formatted: Centered

Supplemental Table 4. Change in Management Plan Items in Group B Subjects as a Function of PET Amyloid Status and AUC Classification

Deleted: 3

|                                                                | <i>Physician Management Plan</i>                               | <i>Added to Management Plan</i> | <i>Removed from Management Plan</i> | <i>Pre-scan Yes/ Post-scan Yes</i> | <i>Pre-scan No/ Post-scan No</i> | <i>Change: Added or removed from the Management Plan</i> | <i>Included in Management Plan Pre Scan</i> | <i>Included in Management Plan Post Scan</i> |
|----------------------------------------------------------------|----------------------------------------------------------------|---------------------------------|-------------------------------------|------------------------------------|----------------------------------|----------------------------------------------------------|---------------------------------------------|----------------------------------------------|
| All Group B AUC subjects (N=60)                                | Brain Structural Imaging (CT/MRI)                              | 1 (1.7%)                        | 18 (30.0%)                          | 10 (16.7%)                         | 31 (51.7%)                       | <b>19 (31.7%)</b>                                        | 28 (46.7%)                                  | 11 (18.3%)                                   |
|                                                                | Lumbar puncture                                                | 0 (0.00%)                       | 14 (23.3%)                          | 0 (0.00%)                          | 46 (76.7%)                       | <b>14 (23.3%)</b>                                        | 14 (23.3%)                                  | 0 (0.00%)                                    |
|                                                                | Neuropsych Testing (brief/extensive)                           | 2 (3.3%)                        | 25 (41.7%)                          | 7 (11.7%)                          | 26 (43.3%)                       | <b>27 (45.0%)</b>                                        | 32 (53.3%)                                  | 9 (15.0%)                                    |
|                                                                | FDG PET                                                        | 1 (1.7%)                        | 13 (21.7%)                          | 1 (1.7%)                           | 45 (75.0%)                       | <b>14 (23.3%)</b>                                        | 14 (23.3%)                                  | 2 (3.3%)                                     |
|                                                                | Apolipoprotein E testing                                       | 0 (0.00%)                       | 3 (5.0%)                            | 2 (3.3%)                           | 55 (91.7%)                       | <b>3 (5.0%)</b>                                          | 5 (8.3%)                                    | 2 (3.3%)                                     |
|                                                                | Lab Tests(CBC/Serum Chemistry/Urinalysis)                      | 0 (0.00%)                       | 11 (18.3%)                          | 8 (13.3%)                          | 41 (68.3%)                       | <b>11 (18.3%)</b>                                        | 19 (31.7%)                                  | 8 (13.3%)                                    |
|                                                                | Refer to a clinical trial for AD or early AD                   | 4 (6.7%)                        | 3 (5.0%)                            | 1 (1.7%)                           | 52 (86.7%)                       | <b>7 (11.7%)</b>                                         | 4 (6.7%)                                    | 5 (8.3%)                                     |
| Give a trial of an acetylcholinesterase inhibitor or memantine | 14 (23.3%)                                                     | 13 (21.7%)                      | 17 (28.3%)                          | 16 (26.7%)                         | <b>27 (45.0%)</b>                | 30 (50.0%)                                               | 31 (51.7%)                                  |                                              |
| All Group B Non-AUC subjects (N=59)                            | Brain Structural Imaging (CT/MRI)                              | 0 (0.00%)                       | 12 (20.3%)                          | 16 (27.1%)                         | 31 (52.5%)                       | <b>12 (20.3%)</b>                                        | 28 (47.5%)                                  | 16 (27.1%)                                   |
|                                                                | Lumbar puncture                                                | 1 (1.7%)                        | 5 (8.5%)                            | 0 (0.00%)                          | 53 (89.8%)                       | <b>6 (10.2%)</b>                                         | 5 (8.5%)                                    | 1 (1.7%)                                     |
|                                                                | Neuropsych Testing (brief/extensive)                           | 2 (3.4%)                        | 18 (30.5%)                          | 10 (16.9%)                         | 29 (49.2%)                       | <b>20 (33.9%)</b>                                        | 28 (47.5%)                                  | 12 (20.3%)                                   |
|                                                                | FDG PET                                                        | 0 (0.00%)                       | 9 (15.3%)                           | 0 (0.00%)                          | 50 (84.7%)                       | <b>9 (15.3%)</b>                                         | 9 (15.3%)                                   | 0 (0.00%)                                    |
|                                                                | Apolipoprotein E testing                                       | 2 (3.4%)                        | 6 (10.2%)                           | 3 (5.1%)                           | 48 (81.4%)                       | <b>8 (13.6%)</b>                                         | 9 (15.3%)                                   | 5 (8.5%)                                     |
|                                                                | Lab Tests(CBC/Serum Chemistry/Urinalysis)                      | 2 (3.4%)                        | 4 (6.8%)                            | 22 (37.3%)                         | 31 (52.5%)                       | <b>6 (10.2%)</b>                                         | 26 (44.1%)                                  | 24 (40.7%)                                   |
|                                                                | Refer to a clinical trial for AD or early AD                   | 6 (10.2%)                       | 5 (8.5%)                            | 0 (0.00%)                          | 48 (81.4%)                       | <b>11 (18.6%)</b>                                        | 5 (8.5%)                                    | 6 (10.2%)                                    |
|                                                                | Give a trial of an acetylcholinesterase inhibitor or memantine | 7 (11.9%)                       | 9 (15.3%)                           | 26 (44.1%)                         | 17 (28.8%)                       | <b>16 (27.1%)</b>                                        | 35 (59.3%)                                  | 33 (55.9%)                                   |

|                                     | <i>Physician Management Plan</i>                               | <i>Added to Management Plan</i> | <i>Removed from Management Plan</i> | <i>Pre-scan Yes/ Post-scan Yes</i> | <i>Pre-scan No/ Post-scan No</i> | <i>Change: Added or removed from the Management Plan</i> | <i>Included in Management Plan Pre Scan</i> | <i>Included in Management Plan Post Scan</i> |
|-------------------------------------|----------------------------------------------------------------|---------------------------------|-------------------------------------|------------------------------------|----------------------------------|----------------------------------------------------------|---------------------------------------------|----------------------------------------------|
| Group B AUC AB+ subjects (N=30)     | Brain Structural Imaging (CT/MRI)                              | 0 (0.00%)                       | 11 (36.7%)                          | 4 (13.3%)                          | 15 (50.0%)                       | <b>11 (36.7%)</b>                                        | 15 (50.0%)                                  | 4 (13.3%)                                    |
|                                     | Lumbar puncture                                                | 0 (0.00%)                       | 7 (23.3%)                           | 0 (0.00%)                          | 23 (76.7%)                       | <b>7 (23.3%)</b>                                         | 7 (23.3%)                                   | 0 (0.00%)                                    |
|                                     | Neuropsych Testing (brief/extensive)                           | 0 (0.00%)                       | 14 (46.7%)                          | 2 (6.7%)                           | 14 (46.7%)                       | <b>14 (46.7%)</b>                                        | 16 (53.3%)                                  | 2 (6.7%)                                     |
|                                     | FDG PET                                                        | 0 (0.00%)                       | 7 (23.3%)                           | 0 (0.00%)                          | 23 (76.7%)                       | <b>7 (23.3%)</b>                                         | 7 (23.3%)                                   | 0 (0.00%)                                    |
|                                     | Apolipoprotein E testing                                       | 0 (0.00%)                       | 2 (6.7%)                            | 2 (6.7%)                           | 26 (86.7%)                       | <b>2 (6.7%)</b>                                          | 4 (13.3%)                                   | 2 (6.7%)                                     |
|                                     | Lab Tests(CBC/Serum Chemistry/Urinalysis)                      | 0 (0.00%)                       | 6 (20.0%)                           | 3 (10.0%)                          | 21 (70.0%)                       | <b>6 (20.0%)</b>                                         | 9 (30.0%)                                   | 3 (10.0%)                                    |
|                                     | Refer to a clinical trial for AD or early AD                   | 4 (13.3%)                       | 1 (3.3%)                            | 1 (3.3%)                           | 24 (80.0%)                       | <b>5 (16.7%)</b>                                         | 2 (6.7%)                                    | 5 (16.7%)                                    |
|                                     | Give a trial of an acetylcholinesterase inhibitor or memantine | 13 (43.3%)                      | 1 (3.3%)                            | 13 (43.3%)                         | 3 (10.0%)                        | <b>14 (46.7%)</b>                                        | 14 (46.7%)                                  | 26 (86.7%)                                   |
| Group B Non-AUC AB+ subjects (N=24) | Brain Structural Imaging (CT/MRI)                              | 0 (0.00%)                       | 6 (25.0%)                           | 5 (20.8%)                          | 13 (54.2%)                       | <b>6 (25.0%)</b>                                         | 11 (45.8%)                                  | 5 (20.8%)                                    |
|                                     | Lumbar puncture                                                | 0 (0.00%)                       | 3 (12.5%)                           | 0 (0.00%)                          | 21 (87.5%)                       | <b>3 (12.5%)</b>                                         | 3 (12.5%)                                   | 0 (0.00%)                                    |
|                                     | Neuropsych Testing (brief/extensive)                           | 1 (4.2%)                        | 10 (41.7%)                          | 1 (4.2%)                           | 12 (50.0%)                       | <b>11 (45.8%)</b>                                        | 11 (45.8%)                                  | 2 (8.3%)                                     |
|                                     | FDG PET                                                        | 0 (0.00%)                       | 5 (20.8%)                           | 0 (0.00%)                          | 19 (79.2%)                       | <b>5 (20.8%)</b>                                         | 5 (20.8%)                                   | 0 (0.00%)                                    |
|                                     | Apolipoprotein E testing                                       | 1 (4.2%)                        | 2 (8.3%)                            | 1 (4.2%)                           | 20 (83.3%)                       | <b>3 (12.5%)</b>                                         | 3 (12.5%)                                   | 2 (8.3%)                                     |
|                                     | Lab Tests(CBC/Serum Chemistry/Urinalysis)                      | 2 (8.3%)                        | 3 (12.5%)                           | 8 (33.3%)                          | 11 (45.8%)                       | <b>5 (20.8%)</b>                                         | 11 (45.8%)                                  | 10 (41.7%)                                   |
|                                     | Refer to a clinical trial for AD or early AD                   | 6 (25.0%)                       | 1 (4.2%)                            | 0 (0.00%)                          | 17 (70.8%)                       | <b>7 (29.2%)</b>                                         | 1 (4.2%)                                    | 6 (25.0%)                                    |
|                                     | Give a trial of an acetylcholinesterase inhibitor or memantine | 5 (20.8%)                       | 2 (8.3%)                            | 17 (70.8%)                         | 0 (0.00%)                        | <b>7 (29.2%)</b>                                         | 19 (79.2%)                                  | 22 (91.7%)                                   |

|                                                                |                                              |            |            |            |                   |                   |            |            |
|----------------------------------------------------------------|----------------------------------------------|------------|------------|------------|-------------------|-------------------|------------|------------|
| Group B AUC AB-subjects (N=30)                                 | Brain Structural Imaging (CT/MRI)            | 1 (3.3%)   | 7 (23.3%)  | 6 (20.0%)  | 16 (53.3%)        | <b>8 (26.7%)</b>  | 13 (43.3%) | 7 (23.3%)  |
|                                                                | Lumbar puncture                              | 0 (0.00%)  | 7 (23.3%)  | 0 (0.00%)  | 23 (76.7%)        | <b>7 (23.3%)</b>  | 7 (23.3%)  | 0 (0.00%)  |
|                                                                | Neuropsych Testing (brief/extensive)         | 2 (6.7%)   | 11 (36.7%) | 5 (16.7%)  | 12 (40.0%)        | <b>13 (43.3%)</b> | 16 (53.3%) | 7 (23.3%)  |
|                                                                | FDG PET                                      | 1 (3.3%)   | 6 (20.0%)  | 1 (3.3%)   | 22 (73.3%)        | <b>7 (23.3%)</b>  | 7 (23.3%)  | 2 (6.7%)   |
|                                                                | Apolipoprotein E testing                     | 0 (0.00%)  | 1 (3.3%)   | 0 (0.00%)  | 29 (96.7%)        | <b>1 (3.3%)</b>   | 1 (3.3%)   | 0 (0.00%)  |
|                                                                | Lab Tests(CBC/Serum Chemistry/Urinalysis)    | 0 (0.00%)  | 5 (16.7%)  | 5 (16.7%)  | 20 (66.7%)        | <b>5 (16.7%)</b>  | 10 (33.3%) | 5 (16.7%)  |
|                                                                | Refer to a clinical trial for AD or early AD | 0 (0.00%)  | 2 (6.7%)   | 0 (0.00%)  | 28 (93.3%)        | <b>2 (6.7%)</b>   | 2 (6.7%)   | 0 (0.00%)  |
| Give a trial of an acetylcholinesterase inhibitor or memantine | 1 (3.3%)                                     | 12 (40.0%) | 4 (13.3%)  | 13 (43.3%) | <b>13 (43.3%)</b> | 16 (53.3%)        | 5 (16.7%)  |            |
| Group B Non-AUC AB-subjects (N=35)                             | Brain Structural Imaging (CT/MRI)            | 0 (0.00%)  | 6 (17.1%)  | 11 (31.4%) | 18 (51.4%)        | <b>6 (17.1%)</b>  | 17 (48.6%) | 11 (31.4%) |
|                                                                | Lumbar puncture                              | 1 (2.9%)   | 2 (5.7%)   | 0 (0.00%)  | 32 (91.4%)        | <b>3 (8.6%)</b>   | 2 (5.7%)   | 1 (2.9%)   |
|                                                                | Neuropsych Testing (brief/extensive)         | 1 (2.9%)   | 8 (22.9%)  | 9 (25.7%)  | 17 (48.6%)        | <b>9 (25.7%)</b>  | 17 (48.6%) | 10 (28.6%) |
|                                                                | FDG PET                                      | 0 (0.00%)  | 4 (11.4%)  | 0 (0.00%)  | 31 (88.6%)        | <b>4 (11.4%)</b>  | 4 (11.4%)  | 0 (0.00%)  |
|                                                                | Apolipoprotein E testing                     | 1 (2.9%)   | 4 (11.4%)  | 2 (5.7%)   | 28 (80.0%)        | <b>5 (14.3%)</b>  | 6 (17.1%)  | 3 (8.6%)   |
|                                                                | Lab Tests(CBC/Serum Chemistry/Urinalysis)    | 0 (0.00%)  | 1 (2.9%)   | 14 (40.0%) | 20 (57.1%)        | <b>1 (2.9%)</b>   | 15 (42.9%) | 14 (40.0%) |
|                                                                | Refer to a clinical trial for AD or early AD | 0 (0.00%)  | 4 (11.4%)  | 0 (0.00%)  | 31 (88.6%)        | <b>4 (11.4%)</b>  | 4 (11.4%)  | 0 (0.00%)  |
| Give a trial of an acetylcholinesterase inhibitor or memantine | 2 (5.7%)                                     | 7 (20.0%)  | 9 (25.7%)  | 17 (48.6%) | <b>9 (25.7%)</b>  | 16 (45.7%)        | 11 (31.4%) |            |

Supplemental Table 5. Change in Diagnosis After Florbetapir PET in Subjects with Prescan Structural Imaging (MRI or CT) as per IIWG AUC

Deleted: 4

| AUC like                         | Prescan diagnosis                                                                | Postscan Diagnosis |                   |                   | Change in Diagnosis |
|----------------------------------|----------------------------------------------------------------------------------|--------------------|-------------------|-------------------|---------------------|
|                                  |                                                                                  | Due to AD          | Indeterminate     | Not due to AD     |                     |
| All subjects (n=93)              | Due to AD: Atypical AD (n=10)                                                    | 7 (70.0%)          | 0 (0.0%)          | 3 (30.0%)         | 3/10 (30.0%)        |
|                                  | Due to AD: Lewy Body Disease with AD (amyloid) pathology (n=2)                   | 1 (50.0%)          | 0 (0.0%)          | 1 (50.0%)         | 1/2 (50.0%)         |
|                                  | Due to AD: Mixed Dementia with AD (n=7)                                          | 5 (71.4%)          | 0 (0.0%)          | 2 (28.6%)         | 2/7 (28.6%)         |
|                                  | Indeterminate: Dementia, MCI or cognitive decline with uncertain etiology (n=69) | 23 (33.3%)         | 21 (30.4%)        | 25 (36.2%)        | 48/69 (69.6%)       |
|                                  | Not due to AD: Dementia or impairment with non AD working diagnosis (n=5)        | 3 (60.0%)          | 0 (0.0%)          | 2 (40.0%)         | 3/5 (60.0%)         |
|                                  | <b>Total</b>                                                                     | <b>39 (41.9%)</b>  | <b>21 (22.6%)</b> | <b>33 (35.5%)</b> | <b>57 (61.3%)</b>   |
| Amyloid-negative subjects (N=53) | Due to AD: Atypical AD (n=3)                                                     | 0 (0.0%)           | 0 (0.0%)          | 3 (100.0%)        | 3/3 (100.0%)        |
|                                  | Due to AD: Lewy Body Disease with AD (amyloid) pathology (n=1)                   | 0 (0.0%)           | 0 (0.0%)          | 1 (100.0%)        | 1/1 (100.0%)        |
|                                  | Due to AD: Mixed Dementia with AD (n=2)                                          | 0 (0.0%)           | 0 (0.0%)          | 2 (100.0%)        | 2/2 (100.0%)        |
|                                  | Indeterminate: Dementia, MCI or cognitive decline with uncertain etiology (n=45) | 0 (0.0%)           | 20 (44.4%)        | 25 (55.6%)        | 25/45 (55.6%)       |
|                                  | Not due to AD: Dementia or impairment with non AD working diagnosis (n=2)        | 0 (0.0%)           | 0 (0.0%)          | 2 (100.0%)        | 0/2 (0.0%)          |
| Amyloid-positive subjects (N=40) | Due to AD: Atypical AD (n=7)                                                     | 7 (100.0%)         | 0 (0.0%)          | 0 (0.0%)          | 0/7 (0.0%)          |
|                                  | Due to AD: Lewy Body Disease with AD (amyloid) pathology (n=1)                   | 1 (100.0%)         | 0 (0.0%)          | 0 (0.0%)          | 0/1 (0.0%)          |
|                                  | Due to AD: Mixed Dementia with AD (n=5)                                          | 5 (100.0%)         | 0 (0.0%)          | 0 (0.0%)          | 0/5 (0.0%)          |
|                                  | Indeterminate: Dementia, MCI or cognitive decline with uncertain etiology (n=24) | 23 (95.8%)         | 1 (4.2%)          | 0 (0.0%)          | 23/24 (95.8%)       |
|                                  | Not due to AD: Dementia or impairment with non AD working diagnosis (n=3)        | 3 (100.0%)         | 0 (0.0%)          | 0 (0.0%)          | 3/3 (100.0%)        |

| Non AUC like                     | Prescan diagnosis                                                                 | Postscan Diagnosis |                   |                   | Change in Diagnosis |
|----------------------------------|-----------------------------------------------------------------------------------|--------------------|-------------------|-------------------|---------------------|
|                                  |                                                                                   | Due to AD          | Indeterminate     | Not due to AD     |                     |
| All subjects (n=136)             | Due to AD: Probable/typical AD (n=30)                                             | 23 (76.7%)         | 6 (20.0%)         | 1 (3.3%)          | 7/30 (23.3%)        |
|                                  | Due to AD: MCI-AD/Prodromal AD (n=35)                                             | 17 (48.6%)         | 16 (45.7%)        | 2 (5.7%)          | 18/35 (51.4%)       |
|                                  | Due to AD: Lewy Body Disease with AD (amyloid) pathology (n=1)                    | 0 (0.0%)           | 0 (0.0%)          | 1 (100.0%)        | 1/1 (100.0%)        |
|                                  | Due to AD: Mixed Dementia with AD (n=1)                                           | 1 (100.0%)         | 0 (0.0%)          | 0 (0.0%)          | 0/1 (0.0%)          |
|                                  | Indeterminate: Dementia, MCI or cognitive decline with uncertain etiologyt (n=53) | 24 (45.3%)         | 21 (39.6%)        | 8 (15.1%)         | 32/53 (60.4%)       |
|                                  | Not due to AD: Dementia or impairment with non AD working diagnosis (n=16)        | 9 (56.3%)          | 1 (6.3%)          | 6 (37.5%)         | 10/16 (62.5%)       |
|                                  | <b>Total</b>                                                                      | <b>74 (54.4%)</b>  | <b>44 (32.4%)</b> | <b>18 (13.2%)</b> | <b>68 (50.0%)</b>   |
| Amyloid-negative subjects (N=63) | Due to AD: Probable/typical AD (n=8)                                              | 1 (12.5%)          | 6 (75.0%)         | 1 (12.5%)         | 7/8 (87.5%)         |
|                                  | Due to AD: MCI-AD/Prodromal AD (n=18)                                             | 0 (0.0%)           | 16 (88.9%)        | 2 (11.1%)         | 18/18 (100.0%)      |
|                                  | Due to AD: Lewy Body Disease with AD (amyloid) pathology (n=1)                    | 0 (0.0%)           | 0 (0.0%)          | 1 (100.0%)        | 1/1 (100.0%)        |
|                                  | Indeterminate: Dementia, MCI or cognitive decline with uncertain etiologyt (n=29) | 0 (0.0%)           | 21 (72.4%)        | 8 (27.6%)         | 8/29 (27.6%)        |
|                                  | Not due to AD: Dementia or impairment with non AD working diagnosis (n=7)         | 0 (0.0%)           | 1 (14.3%)         | 6 (85.7%)         | 1/7 (14.3%)         |
| Amyloid-positive subjects (N=73) | Due to AD: Probable/typical AD (n=22)                                             | 22 (100.0%)        | 0 (0.0%)          | 0 (0.0%)          | 0/22 (0.0%)         |
|                                  | Due to AD: MCI-AD/Prodromal AD (n=17)                                             | 17 (100.0%)        | 0 (0.0%)          | 0 (0.0%)          | 0/17 (0.0%)         |
|                                  | Due to AD: Mixed Dementia with AD (n=1)                                           | 1 (100.0%)         | 0 (0.0%)          | 0 (0.0%)          | 0/1 (0.0%)          |
|                                  | Indeterminate: Dementia, MCI or cognitive decline with uncertain etiologyt (n=24) | 24 (100.0%)        | 0 (0.0%)          | 0 (0.0%)          | 24/24 (100.0%)      |
|                                  | Not due to AD: Dementia or impairment with non AD working diagnosis (n=9)         | 9 (100.0%)         | 0 (0.0%)          | 0 (0.0%)          | 9/9 (100.0%)        |



Supplemental Table 6. Change in Management Plan Items in Group B Subjects as a Function of PET Amyloid Status and AUC Classification in Subjects with Prescan Structural Imaging (MRI or CT) as per IIWG

Deleted: 5

|                                     | <i>Physican Management Plan</i>                                | <i>Added to Management Plan</i> | <i>Removed from Management Plan</i> | <i>Pre-scan Yes/ Post-scan Yes</i> | <i>Pre-scan No/ Post-scan No</i> | <i>Added or removed from the Management Plan</i> | <i>Included in Management Plan Pre Scan</i> | <i>Included in Management Plan Post Scan</i> |
|-------------------------------------|----------------------------------------------------------------|---------------------------------|-------------------------------------|------------------------------------|----------------------------------|--------------------------------------------------|---------------------------------------------|----------------------------------------------|
| All Group B AUC subjects (N=30)     | Brain Structural Imaging (CT/MRI)                              | 0 (0.0%)                        | 5 (16.7%)                           | 0 (0.0%)                           | 25 (83.3%)                       | 5 (16.7%)                                        | 5 (16.7%)                                   | 0 (0.0%)                                     |
|                                     | Lumbar puncture                                                | 0 (0.0%)                        | 13 (43.3%)                          | 0 (0.0%)                           | 17 (56.7%)                       | 13 (43.3%)                                       | 13 (43.3%)                                  | 0 (0.0%)                                     |
|                                     | Neuropsych Testing (brief/extensive)                           | 0 (0.0%)                        | 15 (50.0%)                          | 4 (13.3%)                          | 11 (36.7%)                       | 15 (50.0%)                                       | 19 (63.3%)                                  | 4 (13.3%)                                    |
|                                     | FDG PET                                                        | 0 (0.0%)                        | 11 (36.7%)                          | 0 (0.0%)                           | 19 (63.3%)                       | 11 (36.7%)                                       | 11 (36.7%)                                  | 0 (0.0%)                                     |
|                                     | Apolipoprotein E testing                                       | 0 (0.0%)                        | 2 (6.7%)                            | 1 (3.3%)                           | 27 (90.0%)                       | 2 (6.7%)                                         | 3 (10.0%)                                   | 1 (3.3%)                                     |
|                                     | Lab Tests(CBC/Serum Chemistry/Urinalysis)                      | 0 (0.0%)                        | 3 (10.0%)                           | 1 (3.3%)                           | 26 (86.7%)                       | 3 (10.0%)                                        | 4 (13.3%)                                   | 1 (3.3%)                                     |
|                                     | Refer to a clinical trial for AD or early AD                   | 2 (6.7%)                        | 3 (10.0%)                           | 1 (3.3%)                           | 24 (80.0%)                       | 5 (16.7%)                                        | 4 (13.3%)                                   | 3 (10.0%)                                    |
|                                     | Give a trial of an acetylcholinesterase inhibitor or memantine | 6 (20.0%)                       | 7 (23.3%)                           | 5 (16.7%)                          | 12 (40.0%)                       | 13 (43.3%)                                       | 12 (40.0%)                                  | 11 (36.7%)                                   |
| All Group B Non-AUC subjects (N=89) | Brain Structural Imaging (CT/MRI)                              | 1 (1.1%)                        | 25 (28.1%)                          | 26 (29.2%)                         | 37 (41.6%)                       | 26 (29.2%)                                       | 51 (57.3%)                                  | 27 (30.3%)                                   |
|                                     | Lumbar puncture                                                | 1 (1.1%)                        | 6 (6.7%)                            | 0 (0.0%)                           | 82 (92.1%)                       | 7 (7.9%)                                         | 6 (6.7%)                                    | 1 (1.1%)                                     |
|                                     | Neuropsych Testing (brief/extensive)                           | 4 (4.5%)                        | 28 (31.5%)                          | 13 (14.6%)                         | 44 (49.4%)                       | 32 (36.0%)                                       | 41 (46.1%)                                  | 17 (19.1%)                                   |
|                                     | FDG PET                                                        | 1 (1.1%)                        | 11 (12.4%)                          | 1 (1.1%)                           | 76 (85.4%)                       | 12 (13.5%)                                       | 12 (13.5%)                                  | 2 (2.2%)                                     |
|                                     | Apolipoprotein E testing                                       | 2 (2.2%)                        | 7 (7.9%)                            | 4 (4.5%)                           | 76 (85.4%)                       | 9 (10.1%)                                        | 11 (12.4%)                                  | 6 (6.7%)                                     |
|                                     | Lab Tests(CBC/Serum Chemistry/Urinalysis)                      | 2 (2.2%)                        | 12 (13.5%)                          | 29 (32.6%)                         | 46 (51.7%)                       | 14 (15.7%)                                       | 41 (46.1%)                                  | 31 (34.8%)                                   |
|                                     | Refer to a clinical trial for AD or early AD                   | 8 (9.0%)                        | 5 (5.6%)                            | 0 (0.0%)                           | 76 (85.4%)                       | 13 (14.6%)                                       | 5 (5.6%)                                    | 8 (9.0%)                                     |
|                                     | Give a trial of an acetylcholinesterase inhibitor or memantine | 15 (16.9%)                      | 15 (16.9%)                          | 38 (42.7%)                         | 21 (23.6%)                       | 30 (33.7%)                                       | 53 (59.6%)                                  | 53 (59.6%)                                   |

|                                                                | <i>Physician Management Plan</i>                               | <i>Added to Management Plan</i> | <i>Removed from Management Plan</i> | <i>Pre-scan Yes/ Post-scan Yes</i> | <i>Pre-scan No/ Post-scan No</i> | <i>Added or removed from the Management Plan</i> | <i>Included in Management Plan Pre Scan</i> | <i>Included in Management Plan Post Scan</i> |
|----------------------------------------------------------------|----------------------------------------------------------------|---------------------------------|-------------------------------------|------------------------------------|----------------------------------|--------------------------------------------------|---------------------------------------------|----------------------------------------------|
| Group B AUC AB+ subjects (N=11)                                | Brain Structural Imaging (CT/MRI)                              | 0 (0.0%)                        | 1 (9.1%)                            | 0 (0.0%)                           | 10 (90.9%)                       | 1 (9.1%)                                         | 1 (9.1%)                                    | 0 (0.0%)                                     |
|                                                                | Lumbar puncture                                                | 0 (0.0%)                        | 6 (54.5%)                           | 0 (0.0%)                           | 5 (45.5%)                        | 6 (54.5%)                                        | 6 (54.5%)                                   | 0 (0.0%)                                     |
|                                                                | Neuropsy Testing (brief/extensive)                             | 0 (0.0%)                        | 5 (45.5%)                           | 1 (9.1%)                           | 5 (45.5%)                        | 5 (45.5%)                                        | 6 (54.5%)                                   | 1 (9.1%)                                     |
|                                                                | FDG PET                                                        | 0 (0.0%)                        | 5 (45.5%)                           | 0 (0.0%)                           | 6 (54.5%)                        | 5 (45.5%)                                        | 5 (45.5%)                                   | 0 (0.0%)                                     |
|                                                                | Apolipoprotein E testing                                       | 0 (0.0%)                        | 1 (9.1%)                            | 1 (9.1%)                           | 9 (81.8%)                        | 1 (9.1%)                                         | 2 (18.2%)                                   | 1 (9.1%)                                     |
|                                                                | Lab Tests(CBC/Serum Chemistry/Urinalysis)                      | 0 (0.0%)                        | 0 (0.0%)                            | 0 (0.0%)                           | 11 (100.0%)                      |                                                  |                                             | 0 (0.0%)                                     |
|                                                                | Refer to a clinical trial for AD or early AD                   | 2 (18.2%)                       | 1 (9.1%)                            | 1 (9.1%)                           | 7 (63.6%)                        | 3 (27.3%)                                        | 2 (18.2%)                                   | 3 (27.3%)                                    |
| Give a trial of an acetylcholinesterase inhibitor or memantine | 6 (54.5%)                                                      | 0 (0.0%)                        | 4 (36.4%)                           | 1 (9.1%)                           | 6 (54.5%)                        | 4 (36.4%)                                        | 10 (90.9%)                                  |                                              |
| Group B Non-AUC AB+ subjects (N=43)                            | Brain Structural Imaging (CT/MRI)                              | 0 (0.0%)                        | 16 (37.2%)                          | 9 (20.9%)                          | 18 (41.9%)                       | 16 (37.2%)                                       | 25 (58.1%)                                  | 9 (20.9%)                                    |
|                                                                | Lumbar puncture                                                | 0 (0.0%)                        | 4 (9.3%)                            | 0 (0.0%)                           | 39 (90.7%)                       | 4 (9.3%)                                         | 4 (9.3%)                                    | 0 (0.0%)                                     |
|                                                                | Neuropsy Testing (brief/extensive)                             | 1 (2.3%)                        | 19 (44.2%)                          | 2 (4.7%)                           | 21 (48.8%)                       | 20 (46.5%)                                       | 21 (48.8%)                                  | 3 (7.0%)                                     |
|                                                                | FDG PET                                                        | 0 (0.0%)                        | 7 (16.3%)                           | 0 (0.0%)                           | 36 (83.7%)                       | 7 (16.3%)                                        | 7 (16.3%)                                   | 0 (0.0%)                                     |
|                                                                | Apolipoprotein E testing                                       | 1 (2.3%)                        | 3 (7.0%)                            | 2 (4.7%)                           | 37 (86.0%)                       | 4 (9.3%)                                         | 5 (11.6%)                                   | 3 (7.0%)                                     |
|                                                                | Lab Tests(CBC/Serum Chemistry/Urinalysis)                      | 2 (4.7%)                        | 9 (20.9%)                           | 11 (25.6%)                         | 21 (48.8%)                       | 11 (25.6%)                                       | 20 (46.5%)                                  | 13 (30.2%)                                   |
|                                                                | Refer to a clinical trial for AD or early AD                   | 8 (18.6%)                       | 1 (2.3%)                            | 0 (0.0%)                           | 34 (79.1%)                       | 9 (20.9%)                                        | 1 (2.3%)                                    | 8 (18.6%)                                    |
|                                                                | Give a trial of an acetylcholinesterase inhibitor or memantine | 12 (27.9%)                      | 3 (7.0%)                            | 26 (60.5%)                         | 2 (4.7%)                         | 15 (34.9%)                                       | 29 (67.4%)                                  | 38 (88.4%)                                   |

|                                    |                                                                |          |            |            |            |            |            |            |
|------------------------------------|----------------------------------------------------------------|----------|------------|------------|------------|------------|------------|------------|
| Group B AUC AB-subjects (N=19)     | Brain Structural Imaging (CT/MRI)                              | 0 (0.0%) | 4 (21.1%)  | 0 (0.0%)   | 15 (78.9%) | 4 (21.1%)  | 4 (21.1%)  | 0 (0.0%)   |
|                                    | Lumbar puncture                                                | 0 (0.0%) | 7 (36.8%)  | 0 (0.0%)   | 12 (63.2%) | 7 (36.8%)  | 7 (36.8%)  | 0 (0.0%)   |
|                                    | Neuropsych Testing (brief/extensive)                           | 0 (0.0%) | 10 (52.6%) | 3 (15.8%)  | 6 (31.6%)  | 10 (52.6%) | 13 (68.4%) | 3 (15.8%)  |
|                                    | FDG PET                                                        | 0 (0.0%) | 6 (31.6%)  | 0 (0.0%)   | 13 (68.4%) | 6 (31.6%)  | 6 (31.6%)  | 0 (0.0%)   |
|                                    | Apolipoprotein E testing                                       | 0 (0.0%) | 1 (5.3%)   | 0 (0.0%)   | 18 (94.7%) | 1 (5.3%)   | 1 (5.3%)   | 0 (0.0%)   |
|                                    | Lab Tests(CBC/Serum Chemistry/Urinalysis)                      | 0 (0.0%) | 3 (15.8%)  | 1 (5.3%)   | 15 (78.9%) | 3 (15.8%)  | 4 (21.1%)  | 1 (5.3%)   |
|                                    | Refer to a clinical trial for AD or early AD                   | 0 (0.0%) | 2 (10.5%)  | 0 (0.0%)   | 17 (89.5%) | 2 (10.5%)  | 2 (10.5%)  | 0 (0.0%)   |
|                                    | Give a trial of an acetylcholinesterase inhibitor or memantine | 0 (0.0%) | 7 (36.8%)  | 1 (5.3%)   | 11 (57.9%) | 7 (36.8%)  | 8 (42.1%)  | 1 (5.3%)   |
| Group B Non-AUC AB-subjects (N=46) | Brain Structural Imaging (CT/MRI)                              | 1 (2.2%) | 9 (19.6%)  | 17 (37.0%) | 19 (41.3%) | 10 (21.7%) | 26 (56.5%) | 18 (39.1%) |
|                                    | Lumbar puncture                                                | 1 (2.2%) | 2 (4.3%)   | 0 (0.0%)   | 43 (93.5%) | 3 (6.5%)   | 2 (4.3%)   | 1 (2.2%)   |
|                                    | Neuropsych Testing (brief/extensive)                           | 3 (6.5%) | 9 (19.6%)  | 11 (23.9%) | 23 (50.0%) | 12 (26.1%) | 20 (43.5%) | 14 (30.4%) |
|                                    | FDG PET                                                        | 1 (2.2%) | 4 (8.7%)   | 1 (2.2%)   | 40 (87.0%) | 5 (10.9%)  | 5 (10.9%)  | 2 (4.3%)   |
|                                    | Apolipoprotein E testing                                       | 1 (2.2%) | 4 (8.7%)   | 2 (4.3%)   | 39 (84.8%) | 5 (10.9%)  | 6 (13.0%)  | 3 (6.5%)   |
|                                    | Lab Tests(CBC/Serum Chemistry/Urinalysis)                      | 0 (0.0%) | 3 (6.5%)   | 18 (39.1%) | 25 (54.3%) | 3 (6.5%)   | 21 (45.7%) | 18 (39.1%) |
|                                    | Refer to a clinical trial for AD or early AD                   | 0 (0.0%) | 4 (8.7%)   | 0 (0.0%)   | 42 (91.3%) | 4 (8.7%)   | 4 (8.7%)   | 0 (0.0%)   |
|                                    | Give a trial of an acetylcholinesterase inhibitor or memantine | 3 (6.5%) | 12 (26.1%) | 12 (26.1%) | 19 (41.3%) | 15 (32.6%) | 24 (52.2%) | 15 (32.6%) |
